# Supplementary material
Source: MDPI journal article supplement (https://www.mdpi.com/2304-6740/11/5/215)
Supplement: s1 [file s1]

Supplementary Material for

# **Periodic Density Functional Theory (PDFT) Simulating Crystal Structures with Microporous CHA Framework: an Accuracy and Efficiency Study**

*Xiao-Fang Chen*

*Institute of Molecular Sciences and Engineering, Institute of Frontier and Interdisciplinary Science, Shandong University, Qingdao, 266237, China; chen\_smiling@163.com*

## **Index**

|                                                                                                                        |   |
|------------------------------------------------------------------------------------------------------------------------|---|
| Table S1 Geometric parameters of zeolite chabazite HSSZ-13 (T = Si) reported in the neutron scattering experiment..... | 2 |
| Table S2 Geometrical parameters of Zeolite HSAPO34 (T = P) reported in the neutron scattering experiment.....          | 3 |
| Table S3 The structure of all-silica chabazite optimized by PBE_mGGA. ....                                             | 4 |
| Table S4 The structure of AlPO <sub>4</sub> -34 framework optimized by PBE_mGGA.....                                   | 5 |
| Table S5 The information on seven sets of pseudopotentials selected in this study. ...                                 | 6 |

**Table S1 Geometric parameters of zeolite chabazite HSSZ-13 (T = Si)  
reported in the neutron scattering experiment.**

| <b>parameter</b> | <b>value</b> | <b>parameter</b> | <b>value</b> |
|------------------|--------------|------------------|--------------|
| T-O(1)           | 1.617 Å      | ∠T-O(2)-Si(2)    | 149.42°      |
| T-O(2)           | 1.600 Å      | ∠T-O(3)-Si(3)    | 147.79°      |
| T-O(3)           | 1.615 Å      | ∠T-O(4)-Si(4)    | 149.94°      |
| T-O(4)           | 1.613 Å      | ∠O(1)-T-O(2)     | 110.33°      |
| Si(1)-O(1)       | 1.617 Å      | ∠O(1)-T-O(3)     | 110.21°      |
| Si(2)-O(2)       | 1.600 Å      | ∠O(1)-T-O(4)     | 107.88°      |
| Si(3)-O(3)       | 1.615 Å      | ∠O(2)-T-O(3)     | 109.71°      |
| Si(4)-O(4)       | 1.613 Å      | ∠O(2)-T-O(4)     | 108.42°      |
| ∠T-O(1)- Si(1)   | 144.73°      | ∠O(3)-T-O(4)     | 110.26°      |

**Table S2 Geometrical parameters of Zeolite HSAPO34 (T = P) reported in the neutron scattering experiment.**

| parameter      | value   | parameter      | value   |
|----------------|---------|----------------|---------|
| T-O(1)         | 1.502 Å | ∠T-O(2)-Al (2) | 149.26° |
| T-O(2)         | 1.550 Å | ∠T-O(3)-Al (3) | 150.36° |
| T-O(3)         | 1.589 Å | ∠T-O(4)-Al (4) | 150.55° |
| T-O(4)         | 1.589 Å | ∠O(1)-T-O(2)   | 110.81° |
| Al(1)-O(1)     | 1.815 Å | ∠O(1)-T-O(3)   | 110.69° |
| Al(2)-O(2)     | 1.682 Å | ∠O(1)-T-O(4)   | 107.37° |
| Al(3)-O(3)     | 1.682 Å | ∠O(2)-T-O(3)   | 112.02° |
| Al(4)-O(4)     | 1.652 Å | ∠O(2)-T-O(4)   | 107.39° |
| ∠T-O(1)- Al(1) | 143.63° | ∠O(3)-T-O(4)   | 108.37° |

**Table S3 The structure of all-silica chabazite optimized by PBE\_mGGA.**

| element | x        | y        | z        |
|---------|----------|----------|----------|
| Si      | 0.10555  | 0.33233  | 0.87827  |
| Si      | 0.89445  | 0.66767  | 0.12173  |
| Si      | 0.87828  | 0.10556  | 0.33233  |
| Si      | 0.12173  | 0.89444  | 0.66766  |
| Si      | 0.33233  | 0.87827  | 0.10556  |
| Si      | 0.66767  | 0.12173  | 0.89444  |
| Si      | 0.66767  | 0.89445  | 0.12173  |
| Si      | 0.33233  | 0.10555  | 0.87827  |
| Si      | 0.89445  | 0.12173  | 0.66766  |
| Si      | 0.10555  | 0.87828  | 0.33233  |
| Si      | 0.12173  | 0.66767  | 0.89444  |
| Si      | 0.87827  | 0.33233  | 0.10556  |
| O       | 0.02651  | 0.31693  | 0.02651  |
| O       | 0.97349  | 0.68307  | 0.97349  |
| O       | 0.02651  | 0.02651  | 0.31693  |
| O       | 0.97349  | 0.97349  | 0.68307  |
| O       | 0.31693  | 0.02651  | 0.02651  |
| O       | 0.68307  | 0.97349  | 0.97349  |
| O       | 0.14581  | 0.50000  | 0.85419  |
| O       | 0.85419  | 0.50000  | 0.14581  |
| O       | 0.85419  | 0.14581  | 0.50000  |
| O       | 0.14581  | 0.85419  | 0.50000  |
| O       | 0.50000  | 0.85419  | 0.14581  |
| O       | 0.50000  | 0.14581  | 0.85419  |
| O       | 0.25418  | 0.25418  | 0.89228  |
| O       | 0.74582  | 0.74582  | 0.10772  |
| O       | 0.89228  | 0.25418  | 0.25418  |
| O       | 0.10772  | 0.74582  | 0.74583  |
| O       | 0.25418  | 0.89228  | 0.25417  |
| O       | 0.74582  | 0.10772  | 0.74582  |
| O       | 1.00000  | 0.26031  | 0.73969  |
| O       | -0.00000 | 0.73968  | 0.26031  |
| O       | 0.73968  | -0.00000 | 0.26031  |
| O       | 0.26032  | 1.00000  | 0.73969  |
| O       | 0.26031  | 0.73969  | -0.00000 |
| O       | 0.73969  | 0.26031  | -0.00000 |

**Table S4 The structure of AlPO<sub>4</sub>-34 framework optimized by PBE\_mGGA.**

| index | element | x       | y       | z       |
|-------|---------|---------|---------|---------|
| 1     | P       | 0.11080 | 0.33269 | 0.87871 |
| 2     | P       | 0.88920 | 0.66731 | 0.12129 |
| 3     | P       | 0.87871 | 0.11079 | 0.33269 |
| 4     | P       | 0.12129 | 0.88921 | 0.66731 |
| 5     | P       | 0.33269 | 0.87871 | 0.11080 |
| 6     | P       | 0.66731 | 0.12129 | 0.88920 |
| 7     | Al      | 0.66789 | 0.89999 | 0.12289 |
| 8     | Al      | 0.33211 | 0.10001 | 0.87711 |
| 9     | Al      | 0.90000 | 0.12289 | 0.66789 |
| 10    | Al      | 0.10000 | 0.87711 | 0.33211 |
| 11    | Al      | 0.12289 | 0.66789 | 0.90000 |
| 12    | Al      | 0.87711 | 0.33211 | 0.10000 |
| 13    | O       | 0.03486 | 0.31710 | 0.01623 |
| 14    | O       | 0.96514 | 0.68290 | 0.98377 |
| 15    | O       | 0.01623 | 0.03486 | 0.31710 |
| 16    | O       | 0.98377 | 0.96514 | 0.68290 |
| 17    | O       | 0.31710 | 0.01623 | 0.03486 |
| 18    | O       | 0.68290 | 0.98377 | 0.96514 |
| 19    | O       | 0.15057 | 0.49004 | 0.85926 |
| 20    | O       | 0.84943 | 0.50996 | 0.14074 |
| 21    | O       | 0.85926 | 0.15057 | 0.49004 |
| 22    | O       | 0.14074 | 0.84943 | 0.50996 |
| 23    | O       | 0.49004 | 0.85926 | 0.15057 |
| 24    | O       | 0.50996 | 0.14074 | 0.84943 |
| 25    | O       | 0.24889 | 0.25776 | 0.89175 |
| 26    | O       | 0.75111 | 0.74224 | 0.10825 |
| 27    | O       | 0.89175 | 0.24889 | 0.25776 |
| 28    | O       | 0.10825 | 0.75111 | 0.74224 |
| 29    | O       | 0.25776 | 0.89175 | 0.24889 |
| 30    | O       | 0.74224 | 0.10825 | 0.75111 |
| 31    | O       | 0.01292 | 0.26799 | 0.74738 |
| 32    | O       | 0.98708 | 0.73201 | 0.25262 |
| 33    | O       | 0.74738 | 0.01292 | 0.26799 |
| 34    | O       | 0.25262 | 0.98708 | 0.73201 |
| 35    | O       | 0.26799 | 0.74738 | 0.01291 |
| 36    | O       | 0.73201 | 0.25262 | 0.98709 |

**Table S5 The information on seven sets of pseudopotentials selected in this study.**

| index | pseudopotential category | "TITEL" in POTCAR       |                         |                        |                        | "LEXCH" in POTCAR |
|-------|--------------------------|-------------------------|-------------------------|------------------------|------------------------|-------------------|
|       |                          | Si                      | Al                      | P                      | O                      |                   |
| a)    | USPP_LDA                 | US Si                   | US Al                   | US P                   | US O                   | CA                |
| b)    | USPP_GGA                 | US Si                   | US Al                   | US P                   | US O                   | 91                |
| c)    | LDA_PP                   | PAW Si 02Apr 1999       | PAW Al 17Apr2000        | PAW P 26Mar2009        | PAW O 22Mar2012        | 91                |
| d)    | PAW_GGA                  | PAW_GGA Si 05Jan2001    | PAW_GGA Al 5Jan2001     | PAW_GGA P 21Jan2003    | PAW_GGA O 05Jan2001    | 91                |
| e)    | PAW_PBE                  | PAW_PBE Si 05Jan2001    | PAW_PBE Al 4Jan2001     | PAW_PBE P 17Jan2003    | PAW_PBE O 8Apr2002     | PE                |
| f)    | PBE_GW                   | PAW_PBE Si_GW 04May2012 | PAW_PBE Al_GW 19Mar2012 | PAW_PBE P_GW 19Mar2012 | PAW_PBE O_GW 19Mar2012 | PE                |
| g)    | PBE_mGGA                 | PAW_PBE Si 05Jan2001    | PAW_PBE Al 4Jan2001     | PAW_PBE P 17Jan2003    | PAW_PBE O 8Apr2002     | PE                |

Notes:

1) The meanings of variables of "TITLE = ..." are following:

"TITLE = US Si" refers to the ultrasoft pseudopotential for Si atom.

"TITLE = US P" refers to the ultrasoft pseudopotential for P atom.

"TITLE = PAW Si 02Apr 1999" refers to the projector augmented wave (PAW) potential for Si atom, which built up at about 02 Apr, 1999.

"TITLE = PAW\_GGA Si 05Jan2001" refers to the projector augmented wave (PAW) potential with general gradient approximation for Si atom, which built up at about 02 Apr, 1999.

"TITLE = PAW\_PBE Si 05Jan2001" refers to the projector augmented wave (PAW) potential with the implemented Perdew-Burke-Ernzerh of functional (PAW\_PBE) for Si atom, which is built up at about 05Jan2001.

"TITLE = PAW\_PBE Si\_GW 04May2012" refers to the GW potentials with the implemented Perdew-Burke-Ernzerh (PBE\_GW) for Si atom, which is built up at 04May2012.

PBE\_mGGA refers to strongly constrained and appropriately normed (SCAN) meta-generalized-gradient approximation (meta-GGA) with the implemented Perdew-Burke-Ernzerh of functional (PBE-mGGA).

2) The meanings of variables of "LEXCH" are following:

"LEXCH = CA" means that the exchange-correlation energy functional is the format of local density approximation of Ceperly and Alder (CA) parameterized by J. Perdew and Zunger.

LEXCH = GGA" means that the exchange-correlation energy functional is the format of general gradient approximation (GGA);

LEXCH = 91" means that the exchange-correlation energy functional is the format of Perdew Wang 91 (91) approximation;

LEXCH = PE" means that the exchange-correlation energy functional is the format of Perdew-Burke Ernzerhof (PE) approximation.
